# Supplementary material for: SIRT4 interacts with OPA1 and regulates mitochondrial quality control and mitophagy
Source: publisher site journal article supplement (doi:10.18632/aging.101307), 2017-10-29
Supplement: Supplementary file 1 [file aging-v9i10-101307-supplementary-material-SD1.pdf]

## SUPPLEMENTAL MATERIAL

### SUPPLEMENTARY MATERIALS AND METHODS

#### ImageJ based analysis of confocal microscopic pictures

The following macros were used to quantify mCherry-Parkin dots (A), mitochondrial mass (B), and the length of mitochondrial tubes (C):

(A) Confocal pictures were recorded in ten Z-stacks and analyzed with z-project [run("Z Project...", "projection=[Average Intensity]"); run("Split Channels");]. The MTC02 and mCherry-Parkin channels were made binary [selectWindow("Parkin.lsm"); run("Subtract Background...", "rolling=300 stack"); run("Auto Threshold", "method=MaxEntropy white"); selectWindow("MTC02.lsm"); run("Auto Threshold", "method=RenyiEntropy white");]. The number of mCherry-Parkin dots localized in the regions with MTC02 signals were analyzed with the plugin "Speckle Inspector" [2] [run("Speckle Inspector", "big=MTC02.tif small=Parkin.tif min\_object=3 min\_object\_circularity=0.3 min\_speckle\_size=3 max\_speckle\_size=50 exclude roi speckle");].

(B) Confocal pictures were recorded in ten and more Z-stacks and analyzed with z-project [run("Z Project...", "projection=[Average Intensity]"); run("Split Channels");]. Further on  $\alpha$ -Tubulin signal was reduced to a binary picture [run("Median...", "radius=4"); run("Subtract Background...", "rolling=200"); run("Auto Threshold", "method=Li dark");]. MTC02 signal was detected in regions of interest of the  $\alpha$ -Tubulin signal [run("Analyze Particles...", "size=50-Infinity add"); selectWindow(MTC02); roiManager("Measure");].

(C) Confocal pictures were recorded in ten and more Z-stacks and analyzed with z-project [run("Z Project...", "projection=[Average Intensity]"); run("Split Channels");]. The MTC02 channel was made binary [run("Subtract Background...", "rolling=300 stack"); run("Auto Threshold", "method=Default dark");]. The mitochondrial length was measured by "Particle Length (via Skeleton)" [2] [run("Analyze Particles...", "size=0,3-Infinity show=Outlines display");].

#### Measurement of BrdU incorporation

Primary human dermal fibroblasts were transfected with miR-15b-inhibitors with co-transfection of siRNA duplexes against SIRT4 or control siRNA duplexes.

Following two days, cells were incubated for another two days in culture media containing 10  $\mu$ M BrdU. Staining of fixed cells and further FACS analysis were performed as described in the BrdU staining kit (556029, BD Biosciences). DNA was stained for 10 min with 7-AAD (10  $\mu$ l/10<sup>6</sup> cells; 00-6993-50, eBioscience™).

#### Quantification of mitochondrial mass by MitoTracker® FACS

HEK293 cells were stained with the cell-permeable dye MitoTracker® Deep Red FM (100  $\mu$ M; Thermo Fisher Scientific) for 20 min followed by flow cytometry using a BD FACSCanto™ II system (BD Biosciences) and Flowing Software 2.5.1 (University of Turku, Finland) or FlowJo V10 (FlowJo, LLC).

#### Immunoprecipitation of OPA1 from stably transfected HEK293 cells

Total cell lysates from HEK293 cells stably expressing eGFP, SIRT4-eGFP, SIRT4(H161Y)-eGFP, or SIRT4( $\Delta$ 28N)-eGFP were prepared as described above. Two mg protein was incubated with 0.5  $\mu$ l rabbit anti-OPA1 antibody [3] in a total volume of 300  $\mu$ l lysis buffer [0.3% CHAPS, 50 mM Tris-HCl (pH 7.4), 150 mM NaCl, 1 mM Na<sub>3</sub>VO<sub>4</sub>, 10 mM NaF, 1 mM EDTA, 1 mM EGTA, 2.5 mM Na<sub>4</sub>O<sub>7</sub>P<sub>2</sub>, 1  $\mu$ M DTT, 1x cOmplete™ protease inhibitor cocktail (Roche)] overnight at 4°C. Protein A/G sepharose beads (Santa Cruz Biotechnology 10  $\mu$ l beads in 100  $\mu$ l lysis buffer) were added and followed by incubation for two hours at 4°C under rotation. The beads were washed four-times with 1 ml washing buffer (lysis buffer without cOmplete™ protease inhibitor cocktail) followed by incubation in Laemmli loading buffer at 95°C for 5 min. Samples and total cell lysates (5% of input) were subjected to SDS-PAGE (10% gels) and proteins were transferred to nitrocellulose membranes (Hybond C, GE Healthcare). Membranes were incubated overnight at 4°C with antibodies against GFP (11814460001, Roche Molecular Systems) and OPA1 (612607, BD Biosciences) diluted 1:1000 in TBS containing 0.05% Tween 20.

### SUPPLEMENTARY REFERENCES

1. Lang A, Grether-Beck S, Singh M, Kuck F, Jakob S, Kefalas A, Altinoluik-Hambuchen S, Graffmann N, Schneider M, Lindecke A, Brenden H, Felsner I, Ezzahoini H, et al. MicroRNA-15b regulates mitochondrial ROS production and the senescence-associated secretory phenotype through sirtuin 4/SIRT4. *Aging* (Albany NY). 2016; 8:534-559. <https://doi.org/10.18632/aging.100905>

2. Brocher J. The BioVoxel Image Processing and Analysis Toolbox. EuBIAS-Conference. 2015, Jan 5.
3. Barrera M, Koob S, Dikov D, Vogel F and Reichert AS. OPA1 functionally interacts with MIC60 but is dispensable for crista junction formation. FEBS Lett. 2016; 590(19):3309-3322.  
<https://doi.org/10.1002/1873-3468>

SUPPLEMENTARY FIGURES

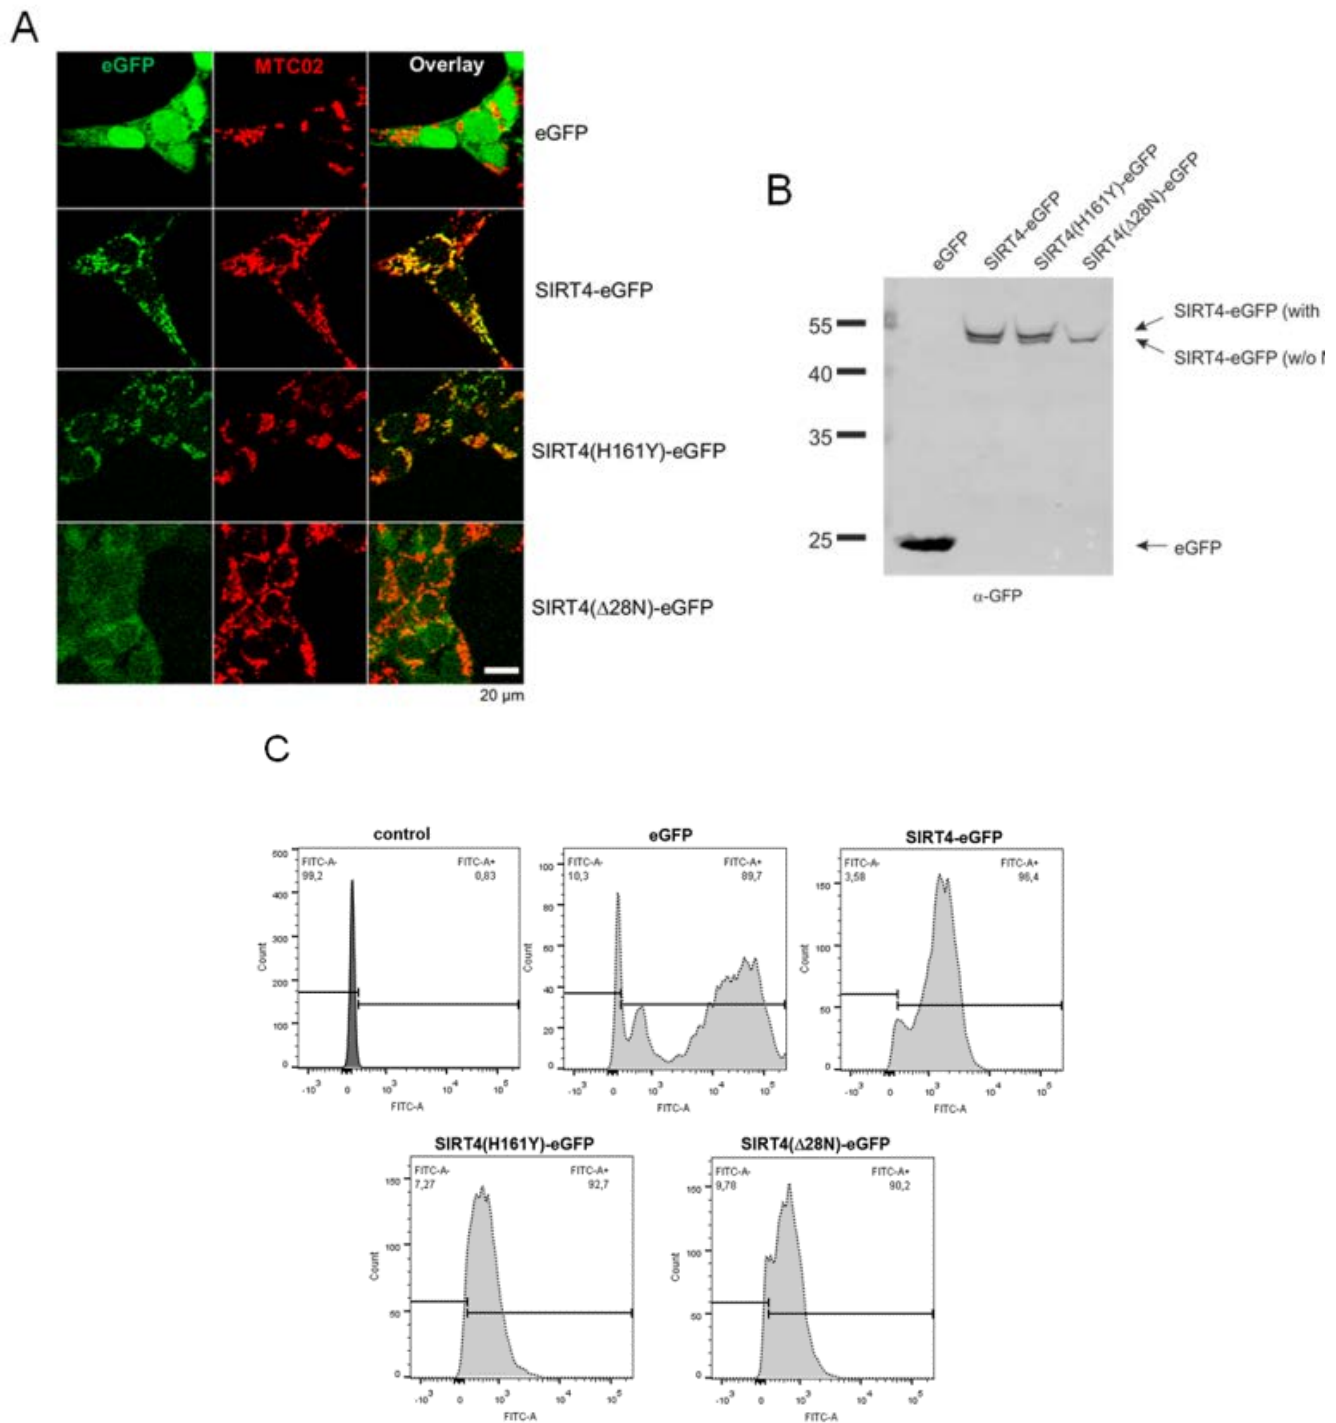

**Supplementary Figure S1. Validation of subcellular localization and expression of eGFP, SIRT4-eGFP, SIRT4(H161Y)-eGFP, and SIRT4(Δ28N)-eGFP in HEK293 cells.** HEK293 cells expressing eGFP, SIRT4-eGFP, SIRT4(H161Y)-eGFP, or SIRT4(Δ28N)-eGFP were subjected to confocal microscopic (A), immunoblot (B), and flow cytometric (C) analysis. MTS, mitochondrial translocation sequence. Representative experiments are depicted.

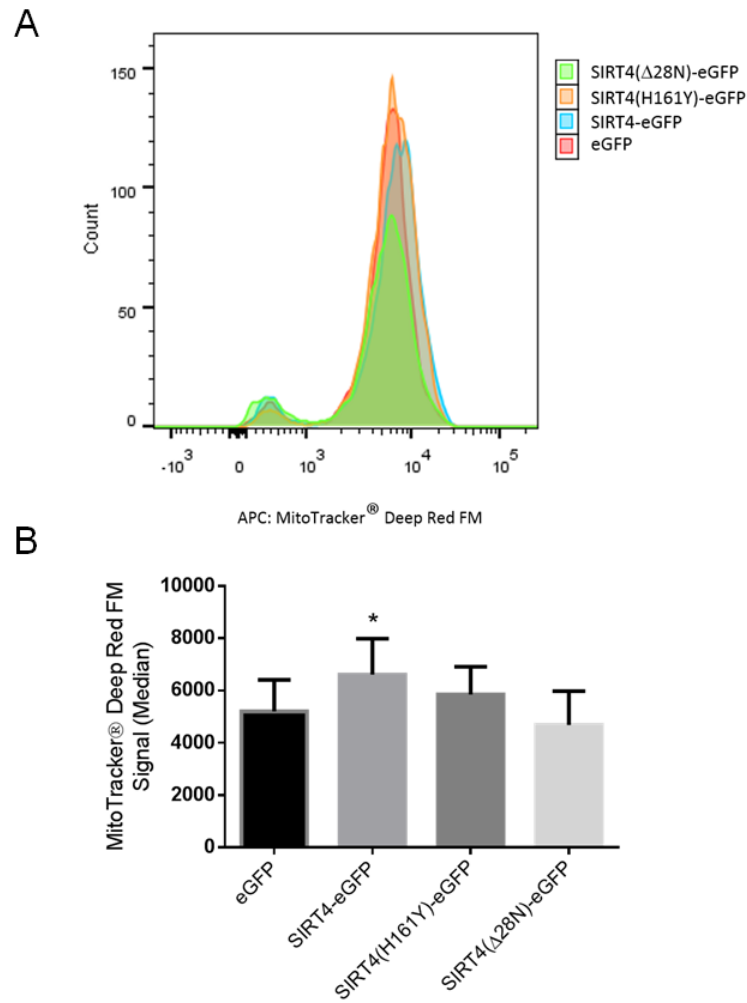

**Supplementary Figure S2. SIRT4-eGFP expression results in a higher mitochondrial mass in HEK293 cells.** (A) Representative flow cytometry profile of HEK293 cells expressing eGFP, SIRT4-eGFP, SIRT4(H161Y)-eGFP, or SIRT4(Δ28N)-eGFP stained with MitoTracker® Deep Red FM. (B) Quantitative analysis of MitoTracker® Deep Red FM signals. To evaluate statistical significance, two-way ANOVA followed-up Tukey's test was performed (\* $p < 0.05$ ;  $n = 3$  experiments).

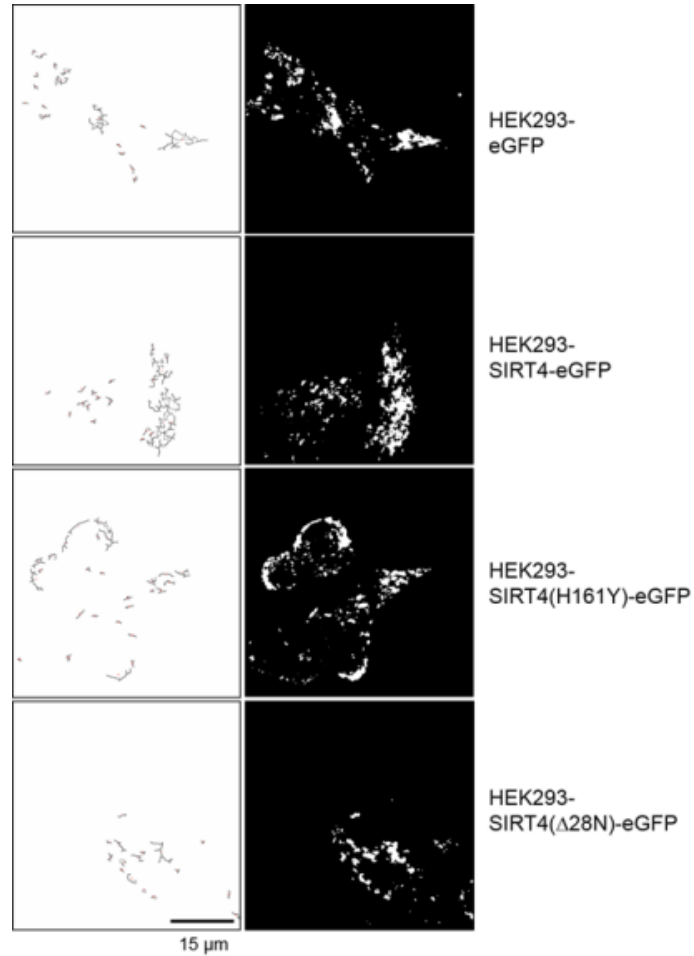

**Supplementary Figure S3. Visualization and analysis of the length of fused mitochondria in HEK293 cells stably expressing SIRT4-eGFP or its mutants.** Tracking of fused mitochondria which were detected by MTCO2 staining (right panels) was analyzed by an ImageJ software based Macro (left panels; Material and Methods & suppl. Material and Methods).

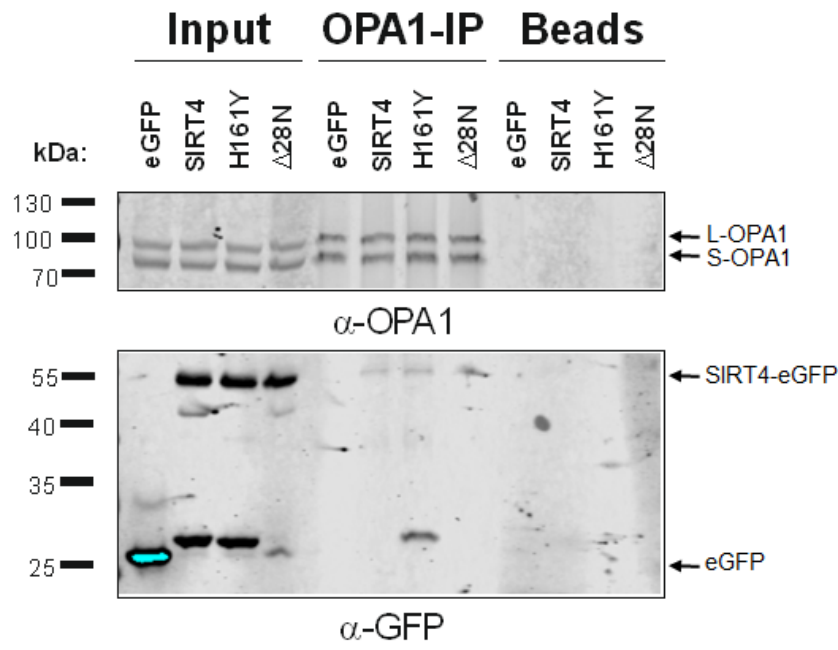

**Supplementary Figure S4. Co-immunoprecipitation of OPA1 and SIRT4-eGFP.** Total cell lysates from HEK293 cells stably expressing SIRT4-eGFP, SIRT4(H161Y)-eGFP, or SIRT4( $\Delta$ 28N)-eGFP were subjected to immunoprecipitation analysis (OPA1-IP) using a rabbit anti-OPA1 antibody (suppl. Material & Methods) followed by detection of co-immunoprecipitated SIRT4-eGFP. Total cell lysates were loaded as input control (5%) and samples w/o antibody employed as beads control.

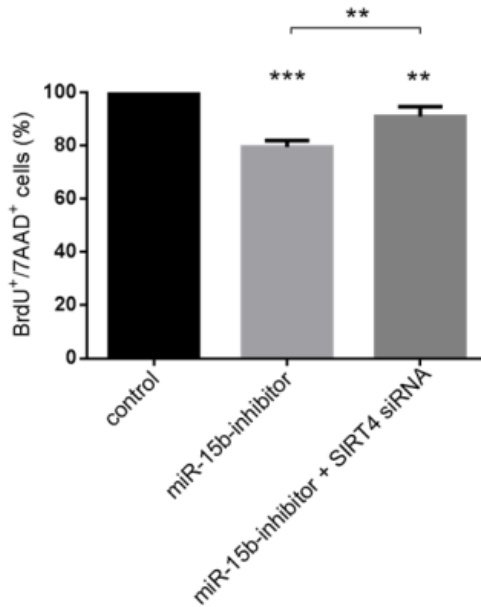

**Supplementary Figure S5. SIRT4 upregulation upon transfection of miR-15b inhibitors inhibits BrdU incorporation in primary human dermal fibroblasts.** Primary human dermal fibroblasts were transfected with miR-15b inhibitors (or control oligonucleotides) in the presence or absence of siRNA duplexes against SIRT4 [35] and cultured for two days. Cells were thereafter pulsed with BrdU for another two days and thereafter subjected to FACS analysis. To evaluate statistical significance, two-way ANOVA followed by Tukey's test was performed (\* $p$ <0.05;  $n$ =3 experiments).

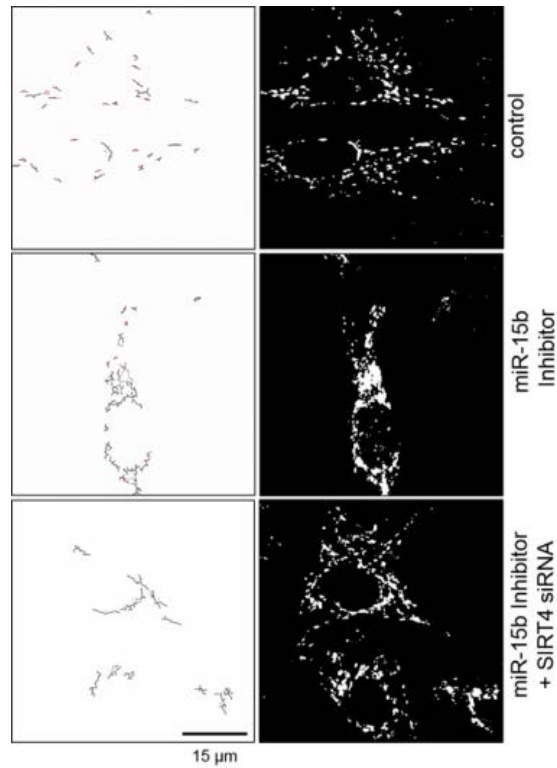

**Supplementary Figure S6. Visualization and analysis of the length of fused mitochondria in primary human dermal fibroblasts upon SIRT4 upregulation through miR-15b inhibition.** Tracking of fused mitochondria which were detected by MTCO2 staining (right panels) was analyzed by an ImageJ software based Macro (left panels; Material and Methods & suppl. Material and Methods).

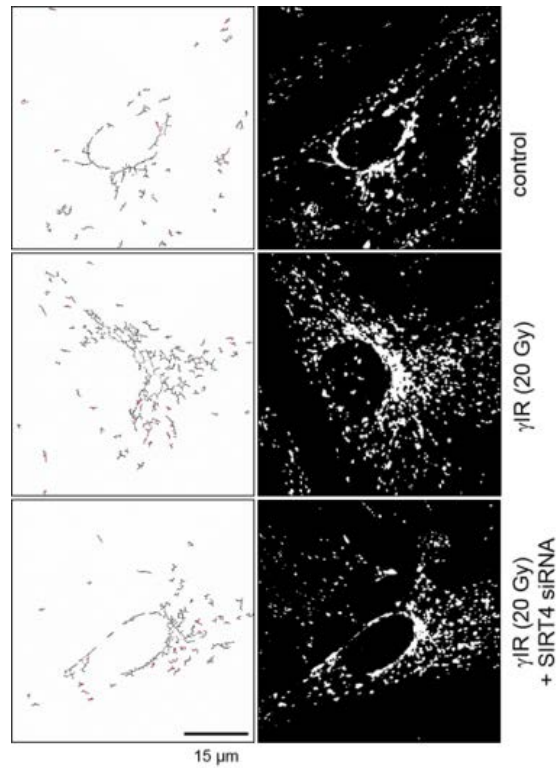

**Supplementary Figure S7. Visualization and analysis of the length of fused mitochondria in primary human dermal fibroblasts upon  $\gamma$ -irradiation.** Tracking of fused mitochondria which were detected by MTCO2 staining (right panels) was analyzed by an ImageJ software based Macro (left panels; Material and Methods & suppl. Material and Methods).



## SUPPLEMENTARY MOVIES

Please browse the Full text version of this manuscript to see the Supplementary Movies 1-10.

**Suppl. Movie 1: 3D reconstruction of the mitochondrial network in HEK293-eGFP cells.** Mitochondria were detected by MTC02 staining and spinning disk confocal microscopic analysis.

**Suppl. Movie 2: 3D reconstruction of the mitochondrial network in HEK293-SIRT4-eGFP cells.** Mitochondria were detected by MTC02 staining and spinning disk confocal microscopic analysis.

**Suppl. Movie 3: 3D reconstruction of the mitochondrial network in HEK293-SIRT4(H161Y)-eGFP cells.** Mitochondria were detected by MTC02 staining and spinning disk confocal microscopic analysis.

**Suppl. Movie 4: 3D reconstruction of the mitochondrial network in HEK293-SIRT4( $\Delta$ 28N)-eGFP cells.** Mitochondria were detected by MTC02 staining and spinning disk confocal microscopic analysis.

**Suppl. Movie 5: 3D reconstruction of the mitochondrial network in primary human dermal fibroblasts.** Mitochondria were detected by MTC02 staining and spinning disk confocal microscopic analysis.

**Suppl. Movie 6: 3D reconstruction of the mitochondrial network in primary human dermal fibroblasts transfected with miR-15b inhibitors.** Mitochondria were detected by MTC02 staining and spinning disk confocal microscopic analysis.

**Suppl. Movie 7: 3D reconstruction of the mitochondrial network in primary human dermal fibroblasts transfected with miR-15b inhibitors and siRNA duplexes against SIRT4.** Mitochondria were detected by MTC02 staining and spinning disk confocal microscopic analysis.

**Suppl. Movie 8: 3D reconstruction of the mitochondrial network in primary human dermal fibroblasts (sham treated).** Mitochondria were detected by MTC02 staining and spinning disk confocal microscopic analysis.

**Suppl. Movie 9: 3D reconstruction of the mitochondrial network in primary human dermal fibroblasts subjected to  $\gamma$ -irradiation (20 Gy).** Mitochondria were detected by MTC02 staining and spinning disk confocal microscopic analysis.

**Suppl. Movie 10: 3D reconstruction of the mitochondrial network in primary human dermal fibroblasts subjected to transfection with siRNA duplexes against SIRT4 and  $\gamma$ -irradiation (20 Gy).** Mitochondria were detected by MTC02 staining and spinning disk confocal microscopic analysis.
